# Supplementary material
Source: ML conference proceedings conference paper supplement (https://openreview.net/forum?id=ARDsBYnarO)
Supplement: supplementary_material [file attachment]

Source code of the work in the paper can be found here: <https://anonymous.4open.science/r/SpikingGamma-ICLR>
